# Supplementary material
Source: PubMed Central journal article supplement (PMC6512325)
Supplement: NIHMS1525490-supplement-1.pdf [file NIHMS1525490-supplement-1.pdf]

## Supplemental Information

### Blockade of MCU-Mediated $\text{Ca}^{2+}$ Uptake

#### Perturbs Lipid Metabolism

#### via PP4-Dependent AMPK Dephosphorylation

**Dhanendra Tomar, Fabián Jaña, Zhiwei Dong, William J. Quinn III, Pooja Jadiya, Sarah L. Breves, Cassidy C. Daw, Subramanya Srikantan, Santhanam Shanmughapriya, Neeharika Nemani, Edmund Carvalho, Aparna Tripathi, Alison M. Worth, Xueqian Zhang, Roshanak Razmpour, Ajay Seelam, Stephen Rhode, Anuj V. Mehta, Michael Murray, Daniel Slade, Servio H. Ramirez, Prashant Mishra, Glenn S. Gerhard, Jeffrey Caplan, Luke Norton, Kumar Sharma, Sudarsan Rajan, Darius Balciunas, Dayanjan S. Wijesinghe, Rexford S. Ahima, Joseph A. Baur, and Muniswamy Madesh**

## SUPPLEMENTAL INFORMATION

### Blockade of MCU-Mediated Ca<sup>2+</sup> Uptake Perturbs Lipid Metabolism via PP4-Dependent AMPK

#### Dephosphorylation

Dhanendra Tomar,<sup>1,2</sup> Fabián Jaña,<sup>1,2</sup> Zhiwei Dong,<sup>1,2</sup> William J. Quinn III,<sup>3</sup> Pooja Jadiya,<sup>2</sup> Sarah L Breves,<sup>1,2</sup> Cassidy C Daw<sup>10</sup>, Subbramanya Srikantan<sup>10</sup>, Santhanam Shanmughapriya,<sup>1,2</sup> Neeharika Nemani,<sup>1,2</sup> Edmund Carvalho,<sup>1,2</sup>, Aparna Tripathi,<sup>1,2</sup> Alison M. Worth,<sup>1,2</sup> Xueqian Zhang,<sup>2</sup> Roshanak Razmpour,<sup>4</sup> Ajay Seelam,<sup>1,2</sup> Stephen Rhode,<sup>1,2</sup> Anuj V Mehta,<sup>2,5</sup> Michael Murray,<sup>1,2</sup> Daniel Slade,<sup>1,2</sup> Servio H. Ramirez,<sup>4</sup> Prashant Mishra,<sup>6</sup> Glenn S Gerhard,<sup>1</sup> Jeffrey Caplan,<sup>7</sup> Luke Norton<sup>11</sup>, Kumar Sharma<sup>10</sup>, Sudarsan Rajan,<sup>1,2</sup> Darius Balciunas,<sup>5</sup> Dayanjan S. Wijesinghe<sup>8</sup>, Rexford S. Ahima<sup>9</sup>, Joseph A. Baur,<sup>3</sup> and Muniswamy Madesh<sup>1,2,10\*</sup>

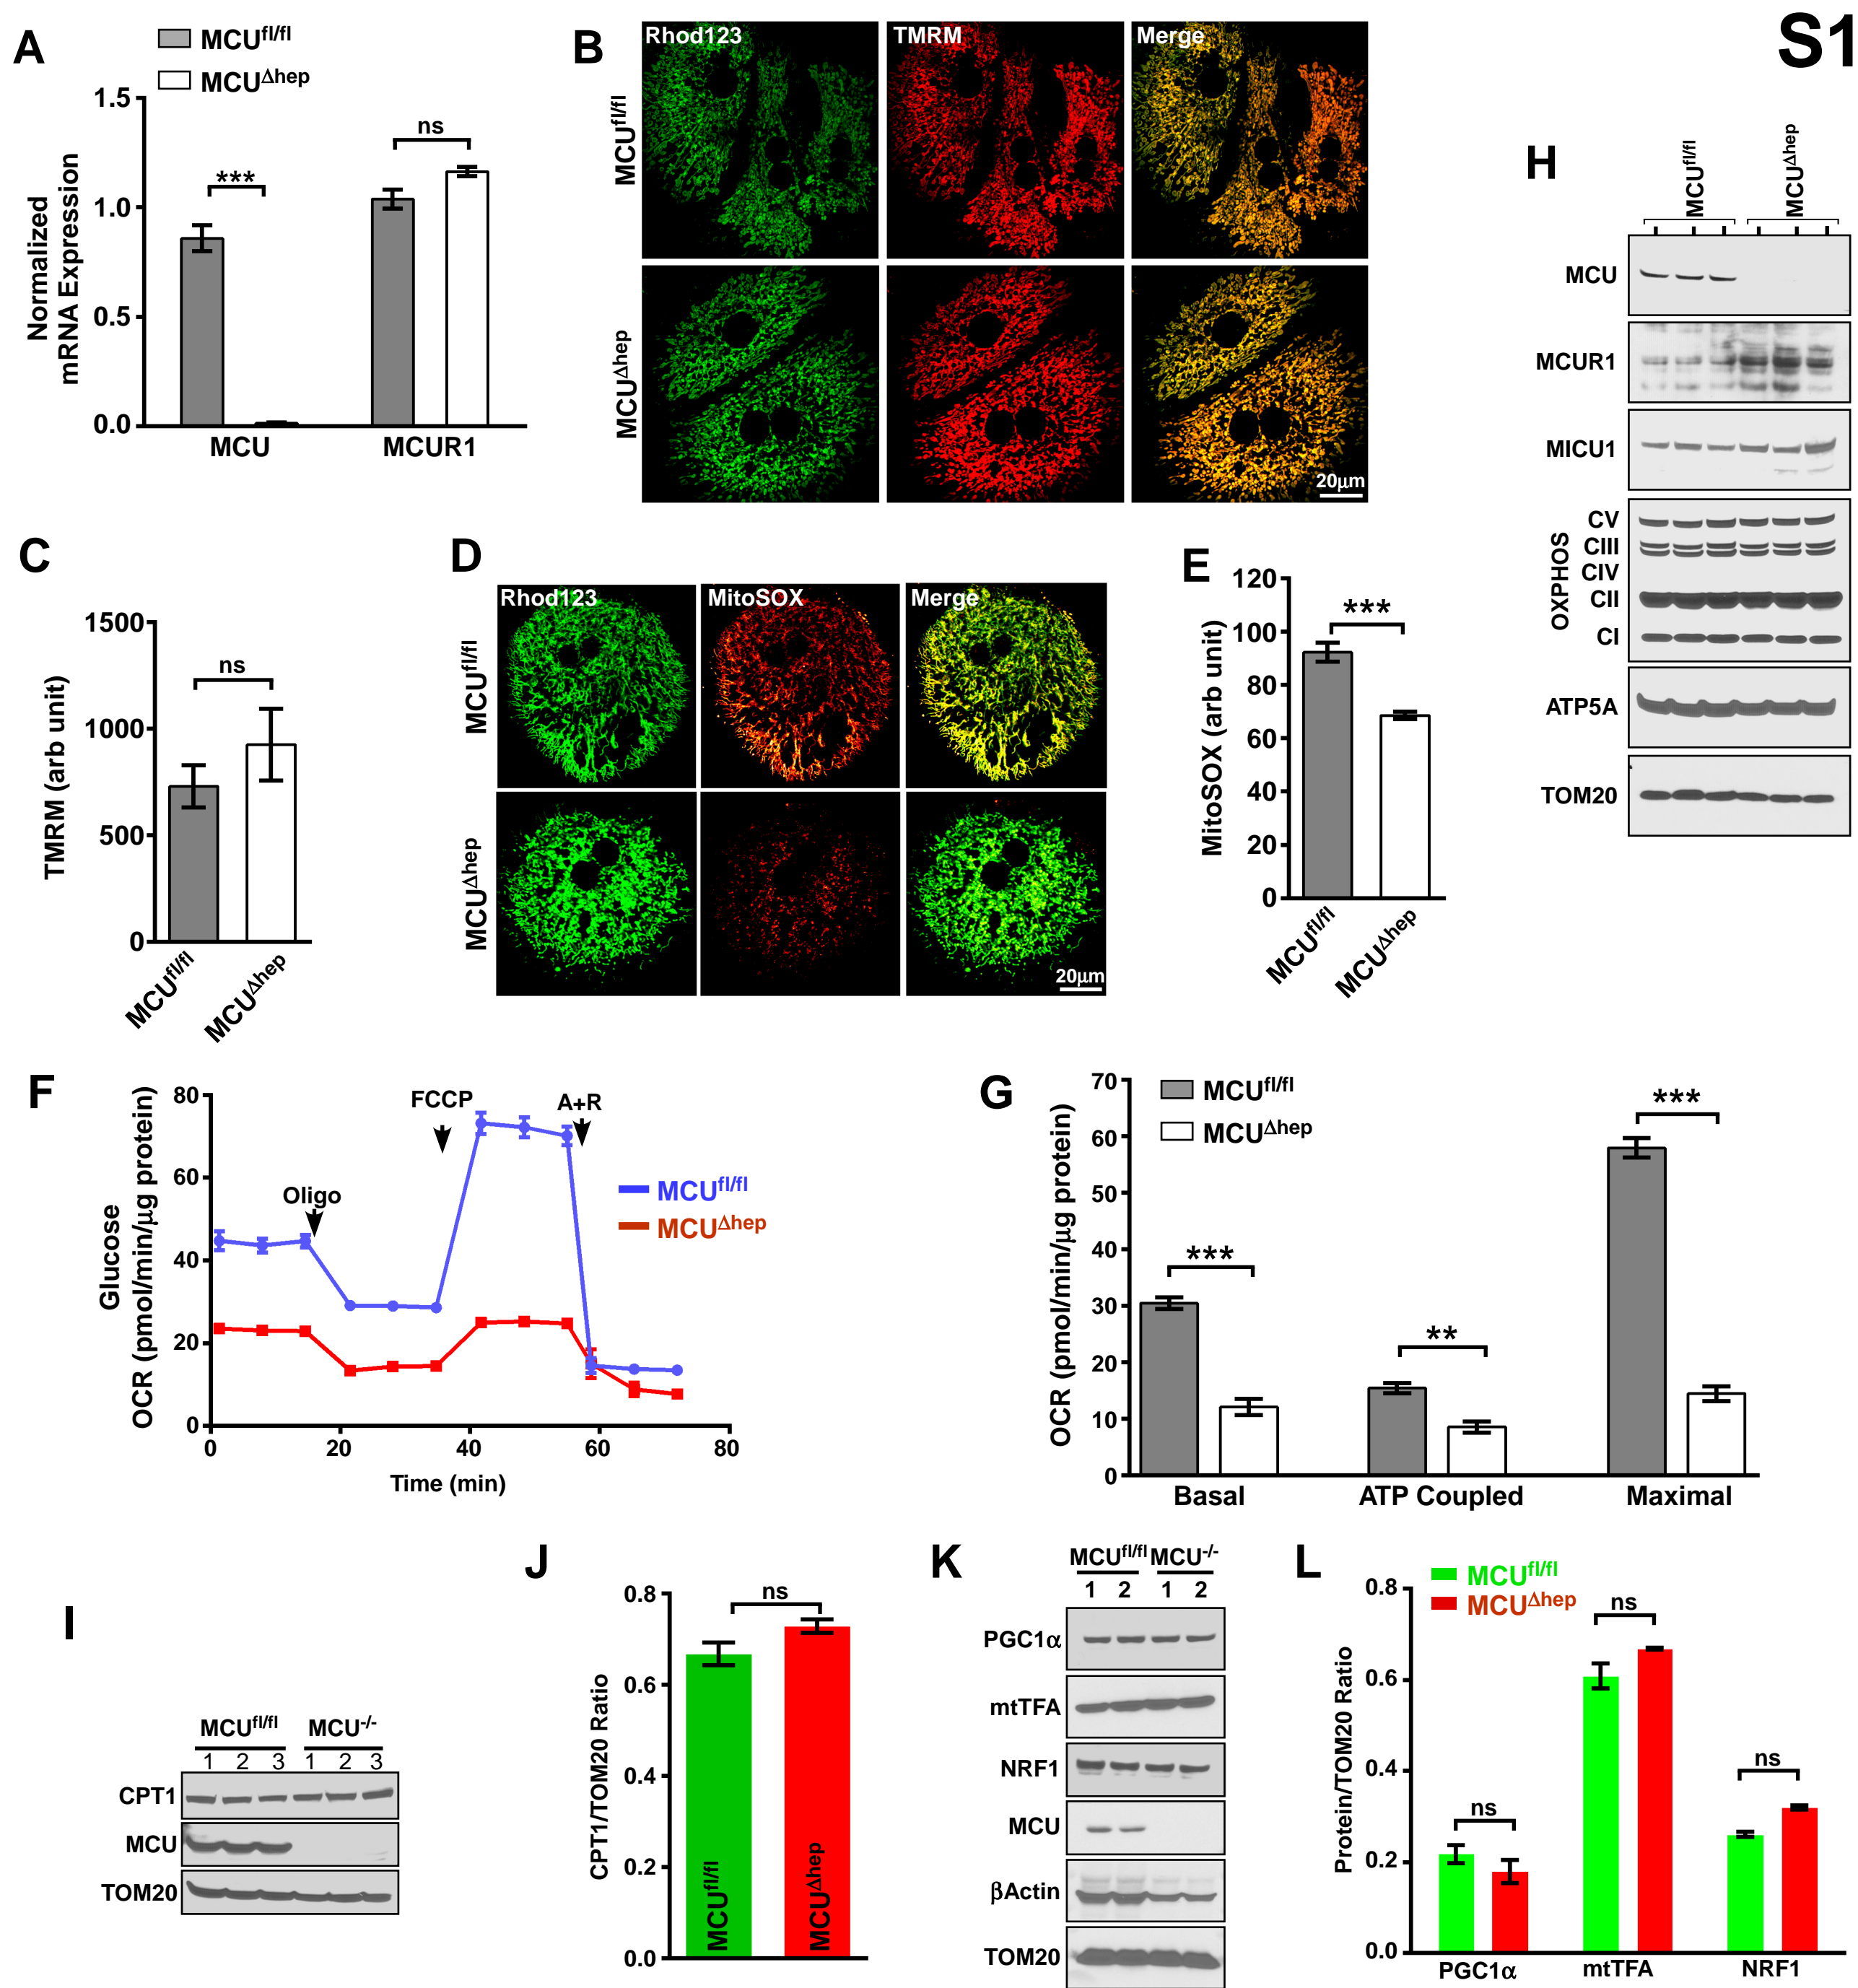

**Figure S1 (Related to Figure 1): Assessment of hepatocyte-specific MCU knockout mice, mitochondrial membrane potential, oxygen consumption rate, and mitochondrial biogenesis-related proteins abundance**

**(A)** MCU and MCUR1 mRNA abundance were quantitated in hepatocytes isolated from MCU<sup>fl/fl</sup> and MCU<sup>Δhep</sup> mice. Mean ± SEM; \*\*\*p < 0.001; ns= not significant; n = 4 mice. **(B)** MCU deletion in hepatocytes does not affect  $\Delta\Psi_m$ . Representative confocal images of primary hepatocytes from MCU<sup>fl/fl</sup> and MCU<sup>Δhep</sup> mice loaded with  $\Delta\Psi_m$  indicator, TMRM (50nM). Scale bar= 20 $\mu$ m. n = 3 mice. **(C)** Quantification of TMRM fluorescence as an indicator of  $\Delta\Psi_m$ . Mean ± SEM; ns= not significant; n = 3 mice. **(D)** Elimination of MCU results in reduced mitochondrial ROS generation. Representative confocal images of primary hepatocytes from MCU<sup>fl/fl</sup> and MCU<sup>Δhep</sup> mice loaded with mitochondrial superoxide indicator, MitoSOX<sup>TM</sup> Red (2  $\mu$ M). Scale bar= 20 $\mu$ m. n = 3 mice. **(E)** Quantification of MitoSOX<sup>TM</sup> Red fluorescence from raw images of Figure S1D, as an indicator of mitochondrial superoxide generation. Mean ± SEM; \*\*\*p < 0.001; n = 3 mice. **(F)** The mitochondrial Oxygen consumption rate (OCR). OCR was measured in MCU<sup>fl/fl</sup> and MCU<sup>Δhep</sup> hepatocytes using the Seahorse XF Analyzer. Mean ± SEM. n = 3 mice. **(G)** After basal OCR was recording, oligomycin, FCCP, and antimycin A + rotenone were added and ATP coupled and maximal OCR were calculated from Figure S1F. Mean ± SEM. \*\*p < 0.01, and \*\*\*p < 0.001. n = 3 mice. **(H)** MCU-KO does not affect the expression of respiratory chain complex proteins. Western blot analysis of MCU-complex (MCU, MCUR1, MICU1) and mitochondrial respiratory chain subunits complex I (NDUFB8), complex II (SDHB), complex III (UQCRC2), complex IV (MTCO1) and ATP synthase subunit ATP5A in MCU<sup>fl/fl</sup> and MCU<sup>Δhep</sup> hepatocytes. TOM20 was used as a loading control. n = 3 mice. **(I)** CPT1 protein expression in MCU<sup>Δhep</sup> hepatocytes. Hepatocytes isolated from MCU<sup>fl/fl</sup> and MCU<sup>Δhep</sup> mice were lysed in RIPA buffer and probed with indicated antibodies. n= 3 mice. **(J)** Bar graph represents densitometric analysis of CPT1 protein abundance. Data represented as mean ± SEM. ns= non-significant p value. n= 3 mice. **(K)** MCU-KO does not have any effect on mitochondrial biogenesis-regulating transcription factors. Hepatocytes isolated from 10-12 week old MCU<sup>fl/fl</sup> and MCU<sup>Δhep</sup> mice were lysed in RIPA buffer and probed with indicated antibodies. n= 4. **(L)** Bar graph represents densitometric analysis of mitochondrial biogenesis-regulating transcription factors protein abundance. Mean ± SEM. ns= non-significant. n= 4.

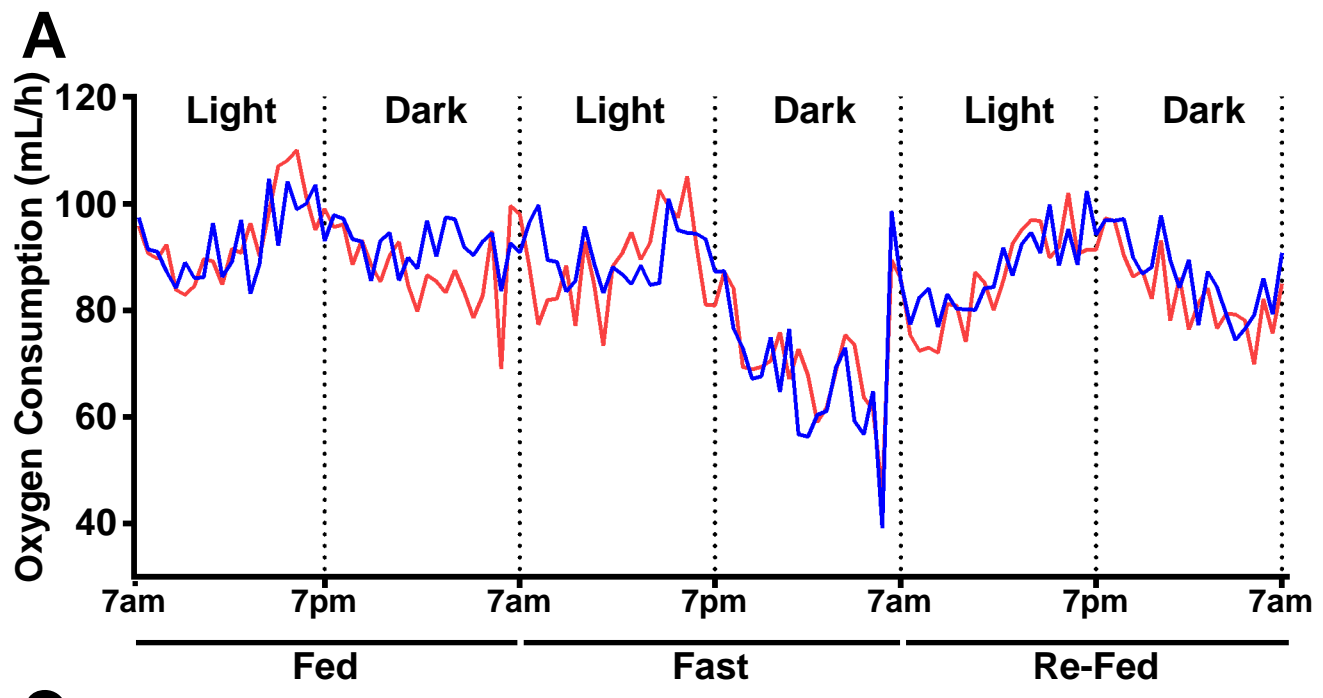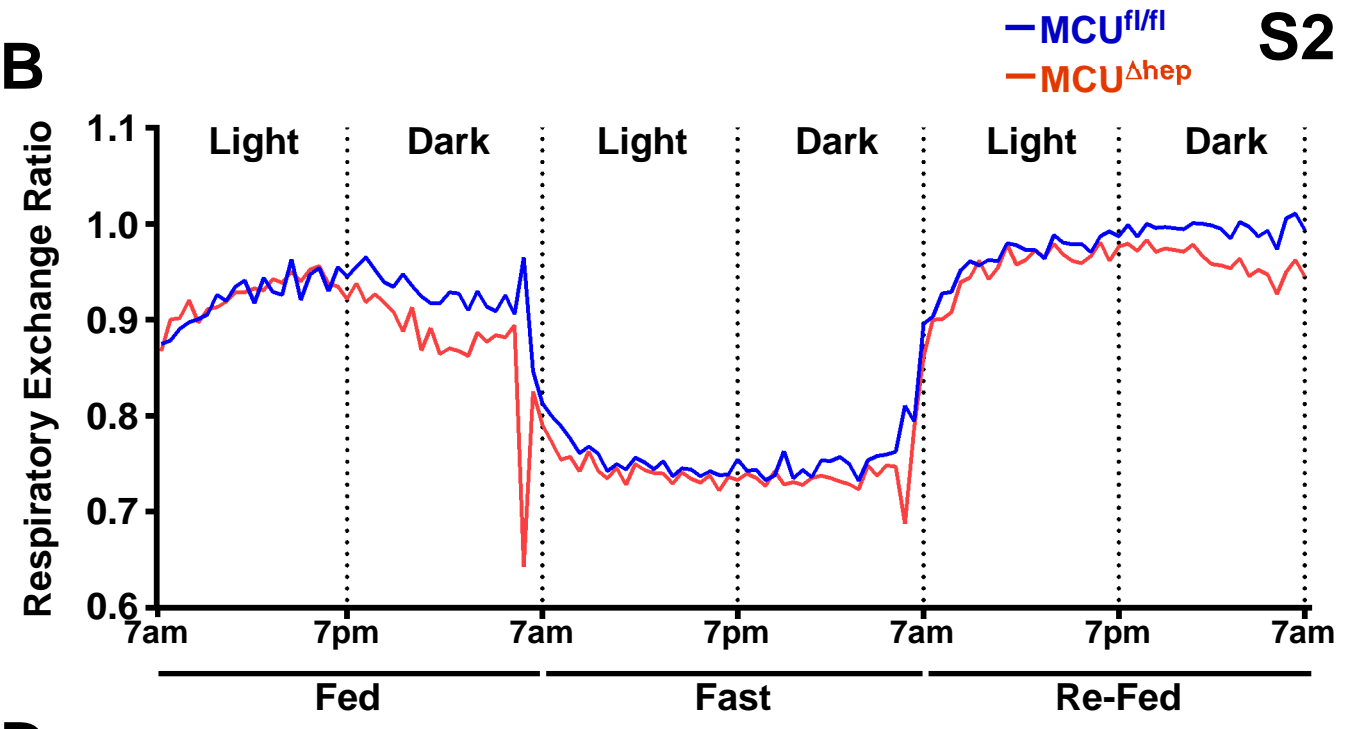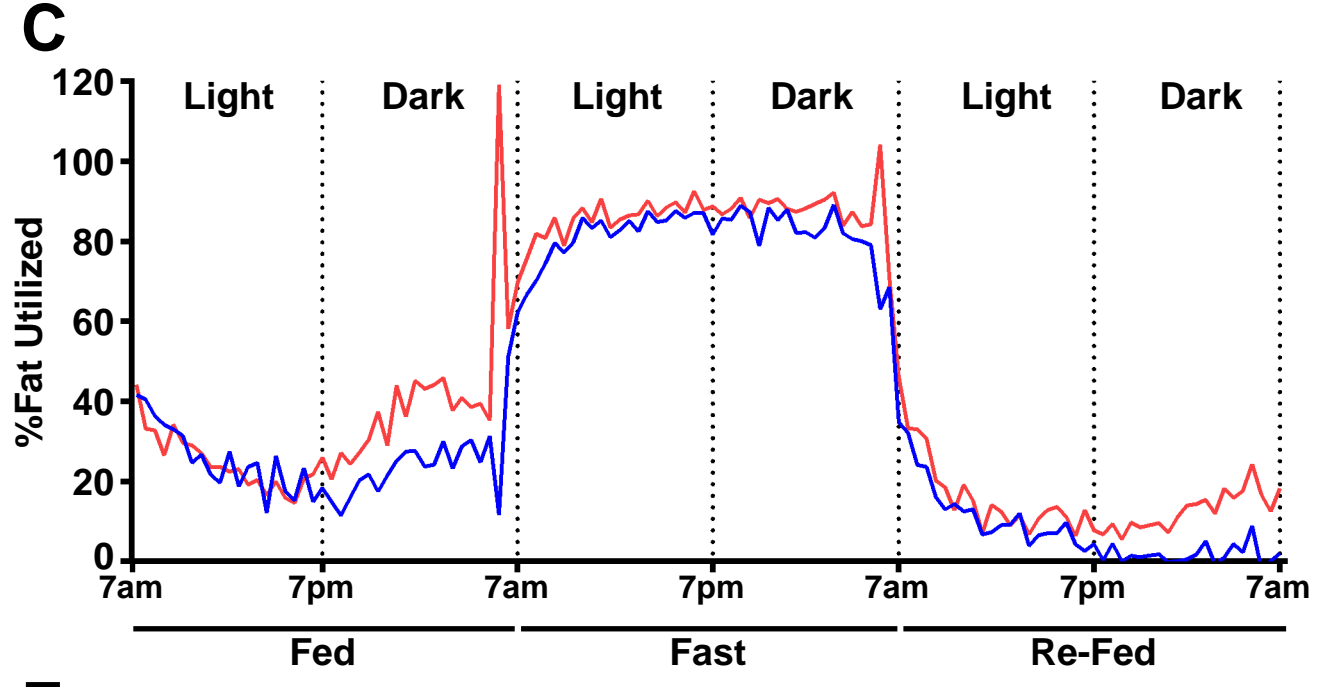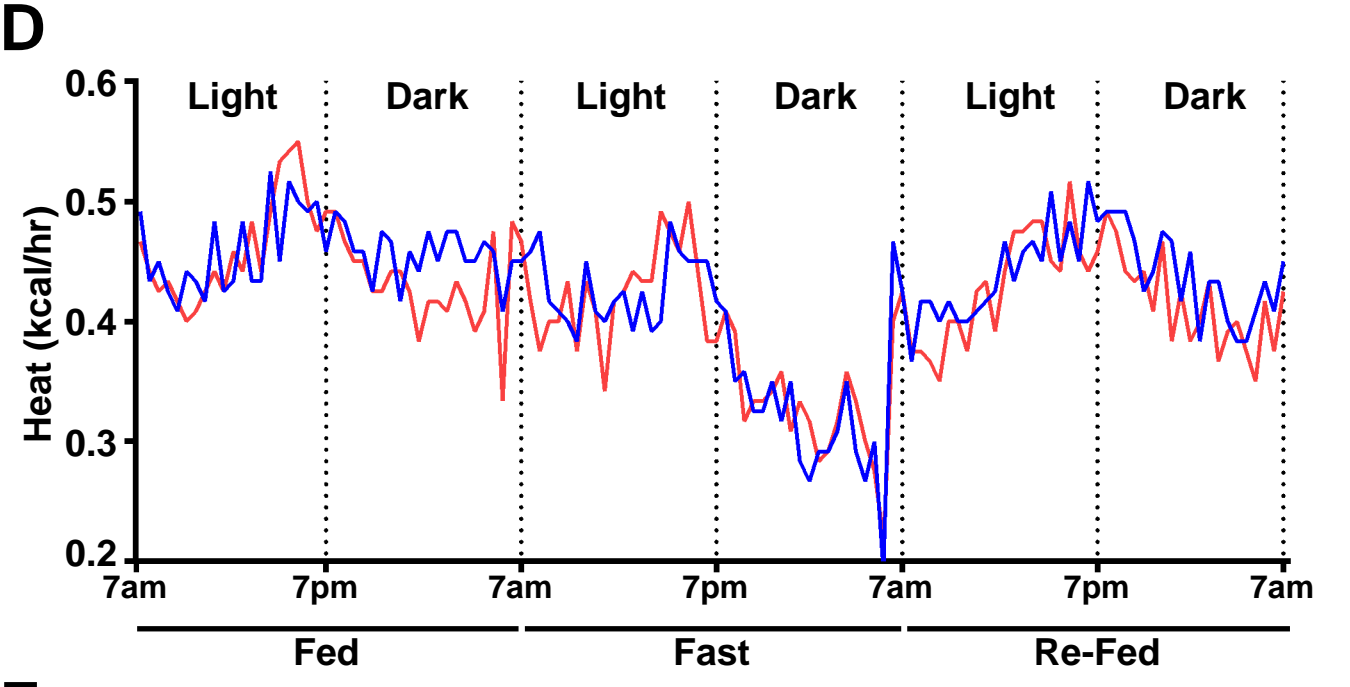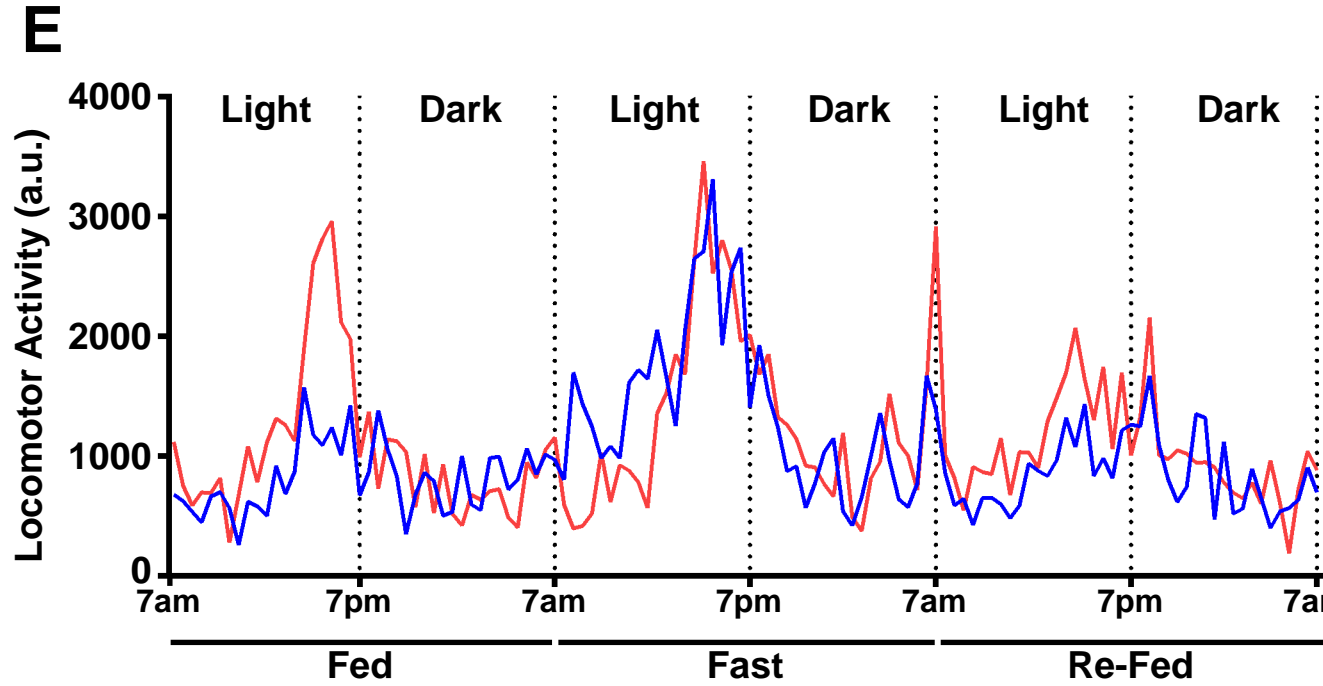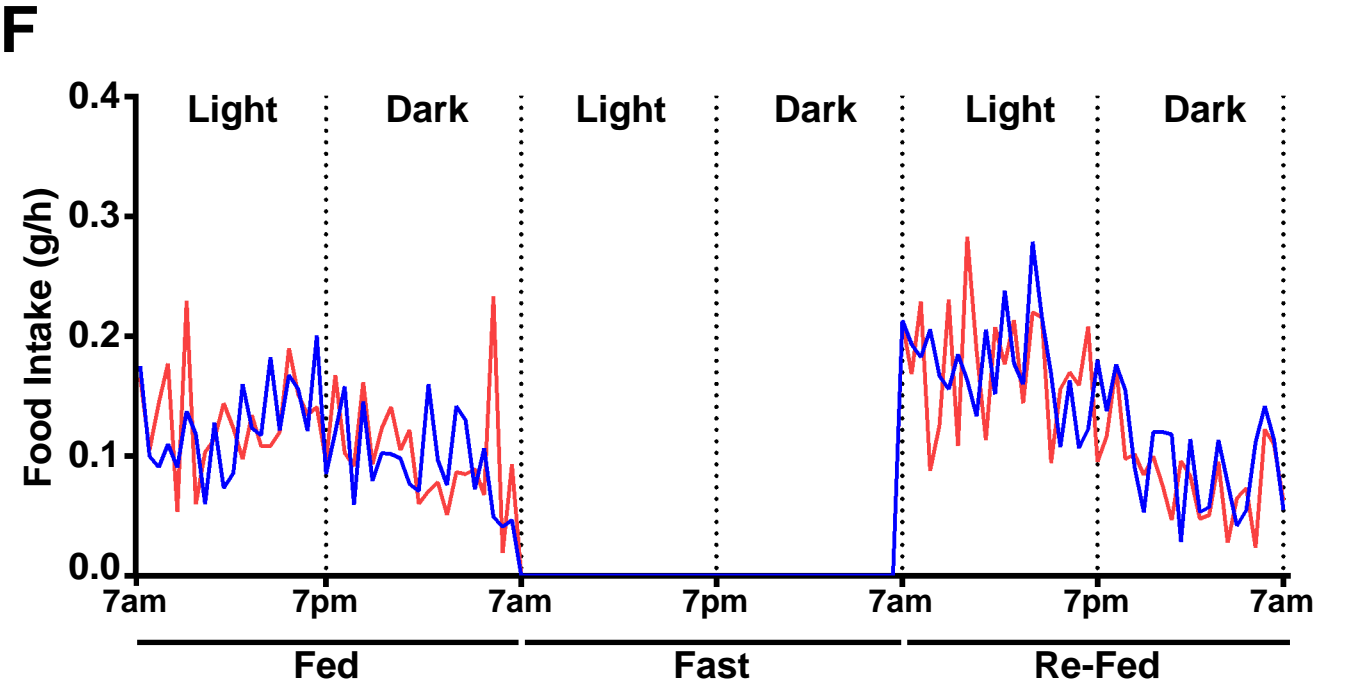

**Figure S2 (Related to Figure 1): Assessment of the metabolic profiles of the mice.**

**(A-F)** MCU<sup>fl/fl</sup> and MCU<sup>Δhep</sup> mice 8-10 weeks old were fed a normal chow diet and studied in a Comprehensive Animal Monitoring System (CLAMS, Columbus Instruments, Columbus, OH). **(A)** Oxygen consumption, **(B)** respiratory exchange ratio, **(C)** %Fat utilized, **(D)** Heat generated, **(E)** locomotor activity, and **(F)** food intake were measured (n = 10-12 mice per group).

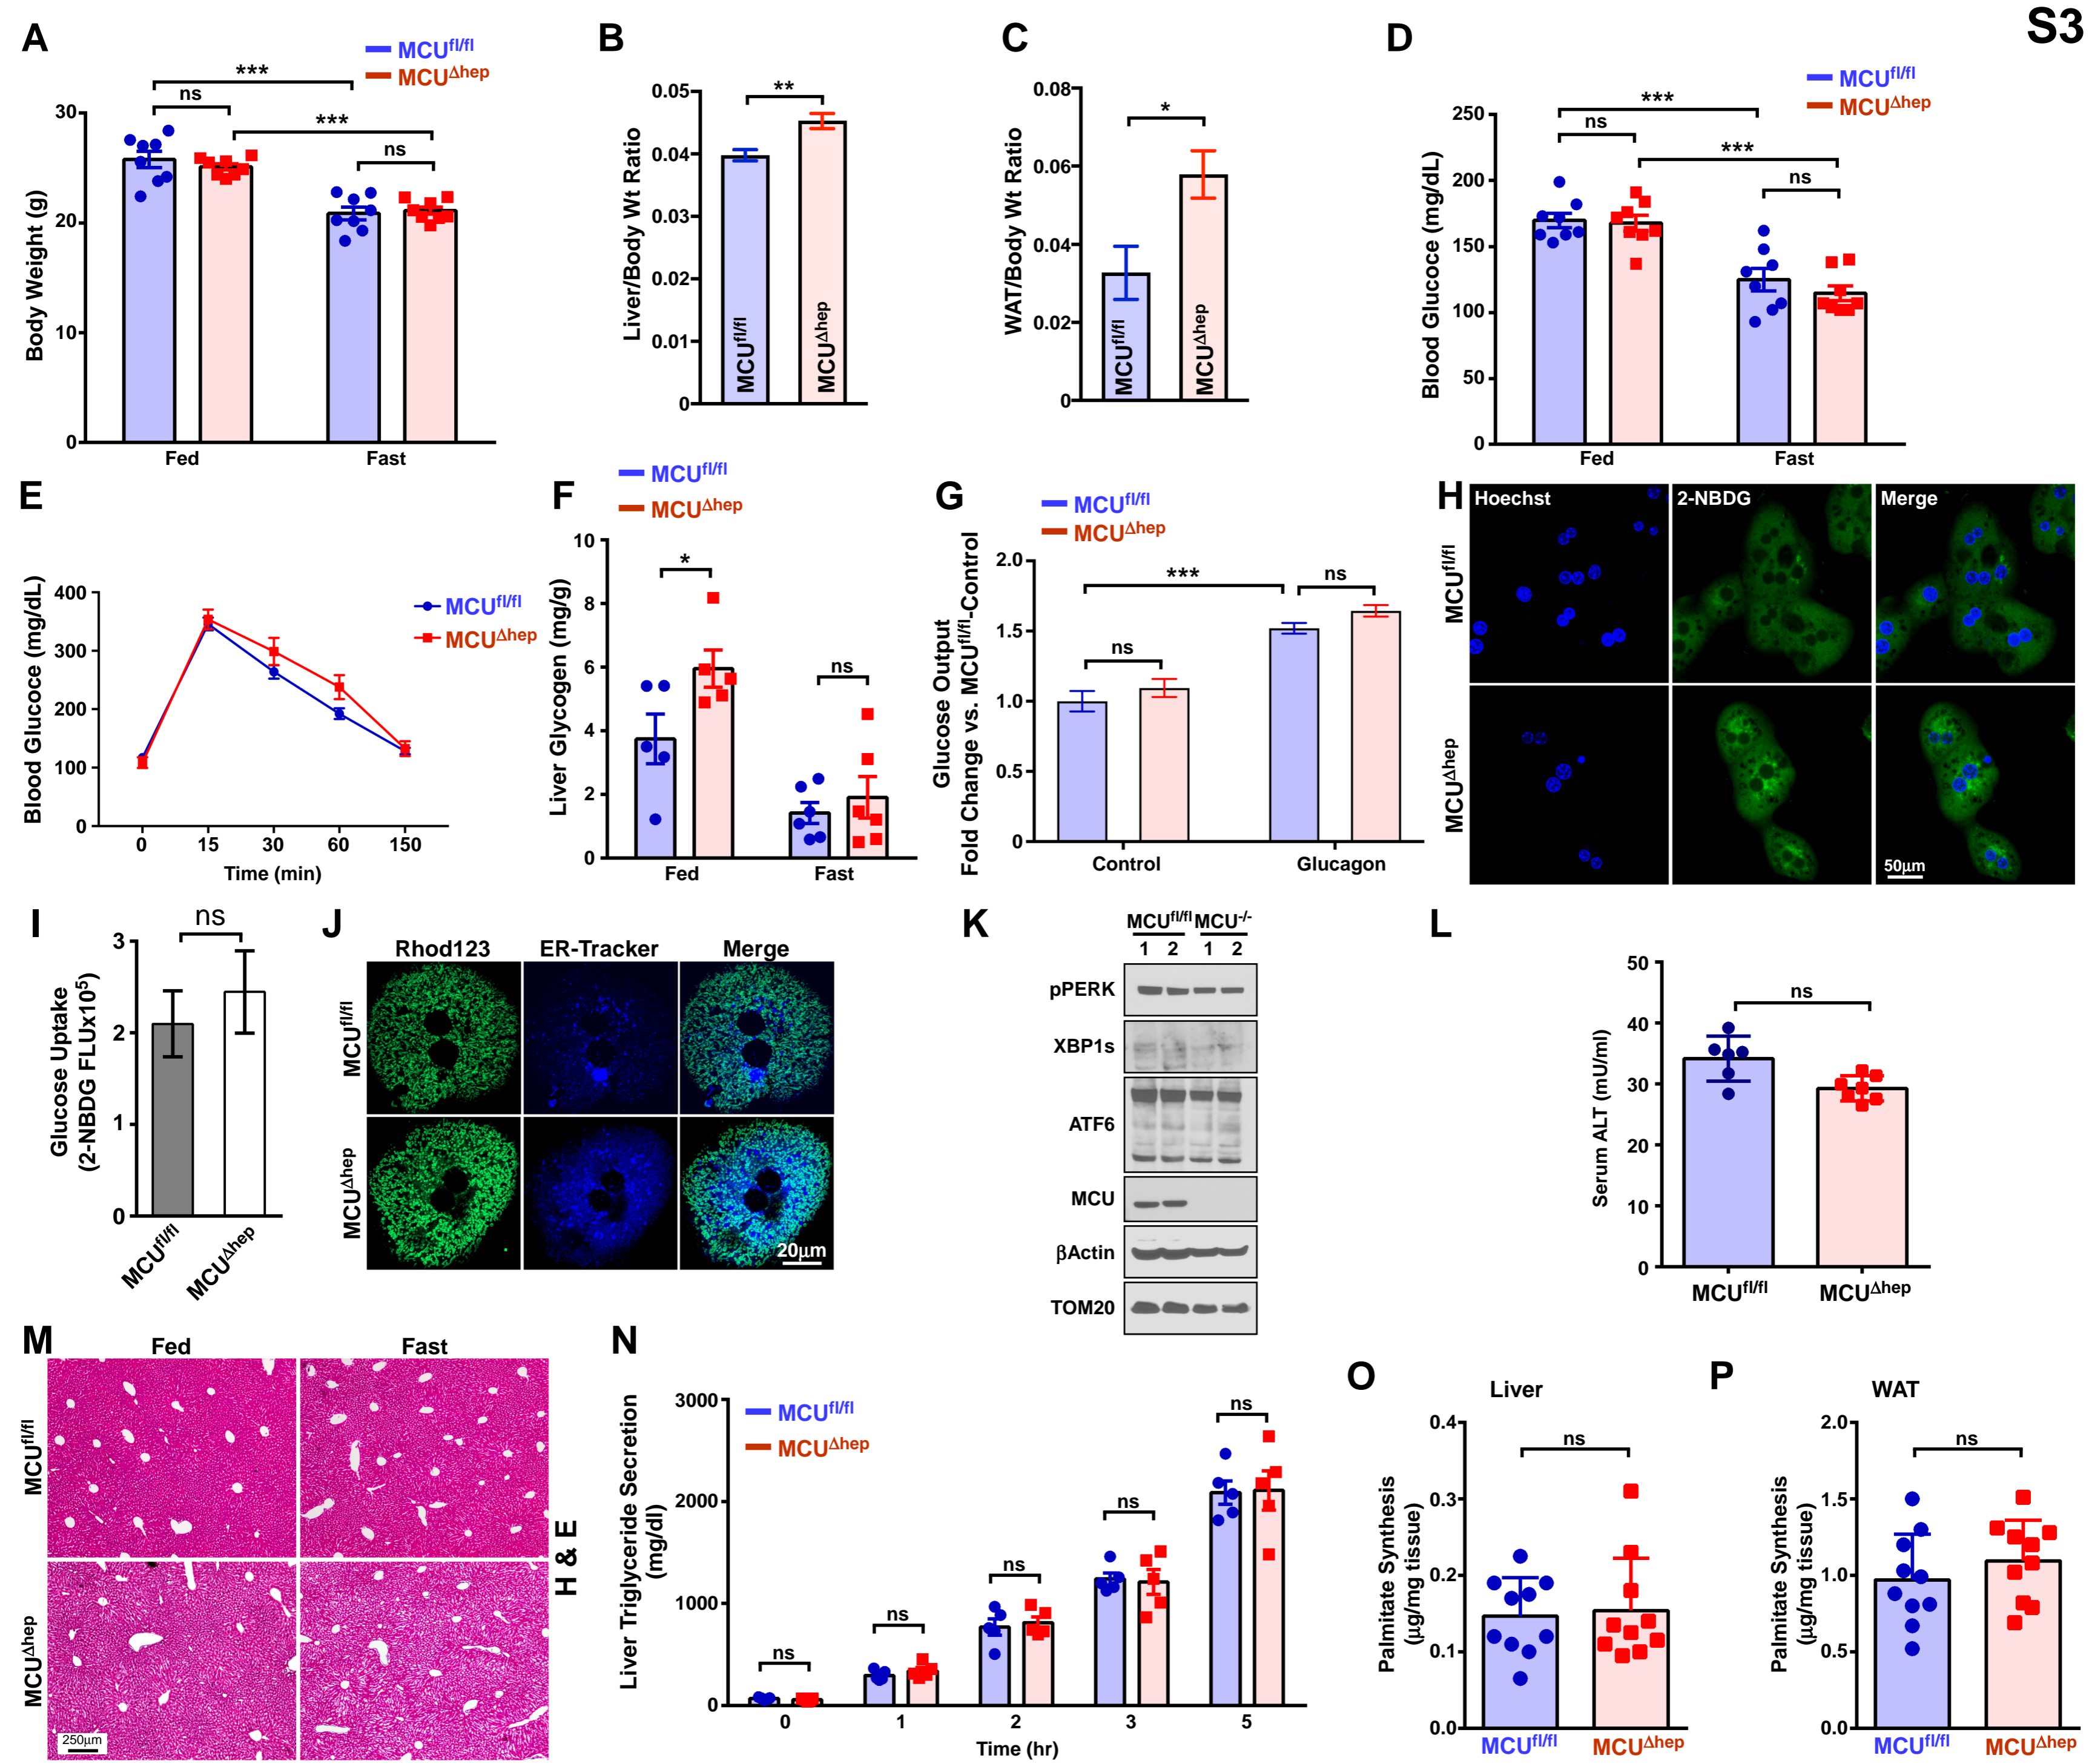

**Figure S3 (Related to Figure 2): Body weight, glucose/glycogen measurements, liver injury assay, liver H&E staining, ER distribution and ER stress, liver TAG secretion, and de novo lipogenesis.**

**(A)** Loss of MCU in hepatic tissue does not alter the gross body weight. Nuclear Magnetic Resonance (NMR) and Dual-Energy X-ray absorptiometry (DEXA) are used for the assessment of 8-week-old MCU<sup>fl/fl</sup> and MCU<sup>Δhep</sup> mice body composition. Mice were fed a normal chow diet and fasted for 24 hours. Body mass was monitored using NMR before and after fasting. Mean ± SEM. \*\*\*p < 0.001, ns= non-significant p value; n = 8 mice per group. **(B and C)** MCU<sup>Δhep</sup> mice demonstrate significantly increased liver/body wt and WAT/body wt ratio as compared to the MCU<sup>fl/fl</sup> mice. The body weight of 8-week old mice was measured, and then liver lobes and WAT was excised for quantification of tissue weights, plotted as tissue/total body wt ratio. Mean ± SEM. \*\*p < 0.01, and \*p < 0.05. n = 5-11 mice. **(D)** Blood glucose levels were unchanged in MCU<sup>Δhep</sup> mice. Tail blood was drawn from 8-week-old MCU<sup>fl/fl</sup> and MCU<sup>Δhep</sup> mice that were fed a normal chow diet and allowed to fast for 24 hours. Blood glucose was measured by an OneTouch Ultra glucometer. Mean ± SEM. \*\*\*p < 0.001, ns= non-significant p value; n = 8 mice per group. **(E)** Loss of *Mcu* does not alter glucose tolerance in mice. The glucose tolerance test was performed as described in the methods section. n = 10 mice per group. **(F)** Hepatic deletion of MCU leads to increased glycogen content in the liver during fed state. Liver tissue collected from fed and 24 hours fasted mice were used for the estimation of liver glycogen using enzymatic assay. Mean ± SEM. \*p < 0.05, ns= non-significant p value; n = 5-6 mice per group. **(G)** Loss of *Mcu* does not alter hepatocyte glucose output. The glucose output assay was performed on primary hepatocytes in response to glucagon, and plotted as fold change compared to the MCU<sup>fl/fl</sup> hepatocytes. Mean ± SEM; \*\*\*p < 0.001, ns= not significant. **(H)** MCU-KO in hepatocytes does not affect hepatic glucose uptake. Glucose uptake was visualized by confocal microscope after culturing the hepatocytes from MCU<sup>fl/fl</sup> and MCU<sup>Δhep</sup> mice with 2-NBDG instead of glucose. Hoechst stain was used to visualize nuclei. n = 3 mice. **(I)** Bar graph for the quantification of 2-NBDG fluorescence as an indicator of glucose uptake. Mean ± SEM; ns= not significant. n = 3 mice. **(J)** MCU-KO does not affect endoplasmic reticulum distribution. Hepatocytes isolated from MCU<sup>fl/fl</sup> and MCU<sup>Δhep</sup> mice were stained with Rhod123 and ER-tracker Blue. Distribution of mitochondria and ER was visualized by confocal imaging. n = 3. **(K)** Loss of MCU in hepatocytes does not show altered ER-stress. Hepatocytes isolated from 10-12 week old MCU<sup>fl/fl</sup> and MCU<sup>Δhep</sup> mice were lysed in RIPA buffer and probed with indicated antibodies. n = 4 mice. **(L)** Bar graph showing plasma ALTase activity as a measure of liver injury. Mean ± SEM; ns= not



significant; n = 3 mice. **(M)** MCU-KO liver section does not show any gross morphological alterations. Liver from MCU<sup>fl/fl</sup> and MCU<sup>Δhep</sup> mice were perfused, fixed, and stained with H&E. Representative histological section image (4 x magnification). n = 3 mice per group. **(N)** Loss of MCU in hepatic tissue does not alter the liver triglyceride secretion. **(O)** MCU<sup>Δhep</sup> mice have normal hepatic de novo lipogenesis as measured by palmitate synthesis. Mean ± SEM. ns= non-significant p value; n = 10 mice per group. **(P)** MCU<sup>Δhep</sup> mice have normal white adipose tissue (WAT) de novo lipogenesis as measured by palmitate synthesis. Mean ± SEM. ns= non-significant p value; n = 10 mice per group.

**A****TMRM****WT****MCU<sup>+/-</sup>****MCU<sup>-/-</sup>**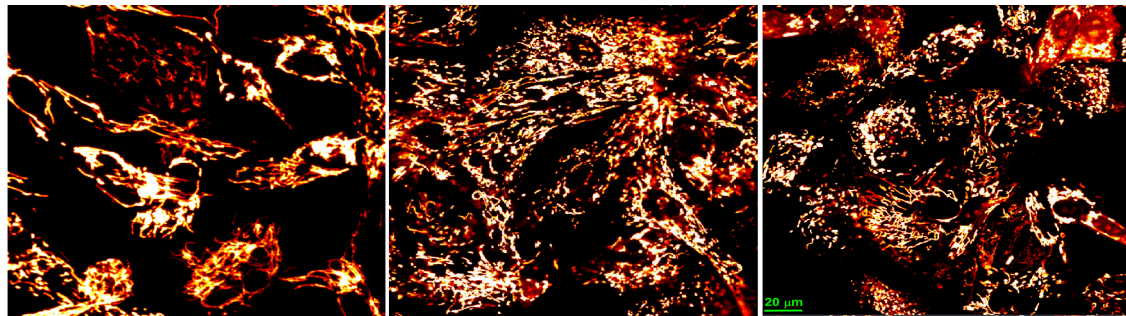**B**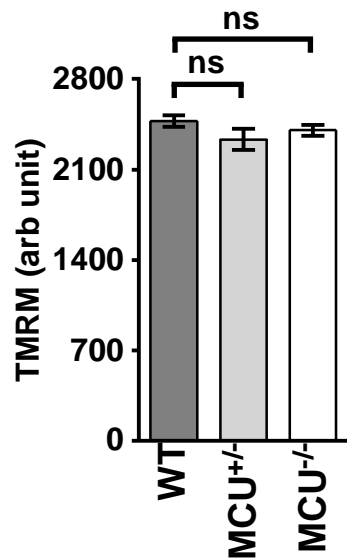**S4**

**Figure S4 (Related to Figure 3): Assessment of mitochondrial membrane potential ( $\Delta\Psi_m$ ) in zebrafish primary cells.**

**(A)** MCU deletion did not alter  $\Delta\Psi_m$ . Representative confocal images of primary cells from WT, MCU<sup>+/-</sup> and MCU<sup>-/-</sup> zebrafish stained with  $\Delta\Psi_m$  indicator, TMRM (50nM). n = 3. **(B)** Quantification of TMRM fluorescence.

Mean  $\pm$  SEM; ns= not significant; n = 3.

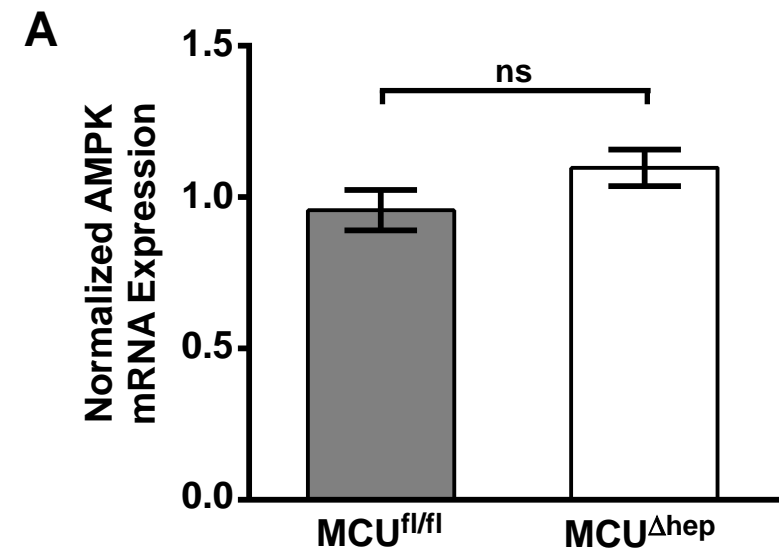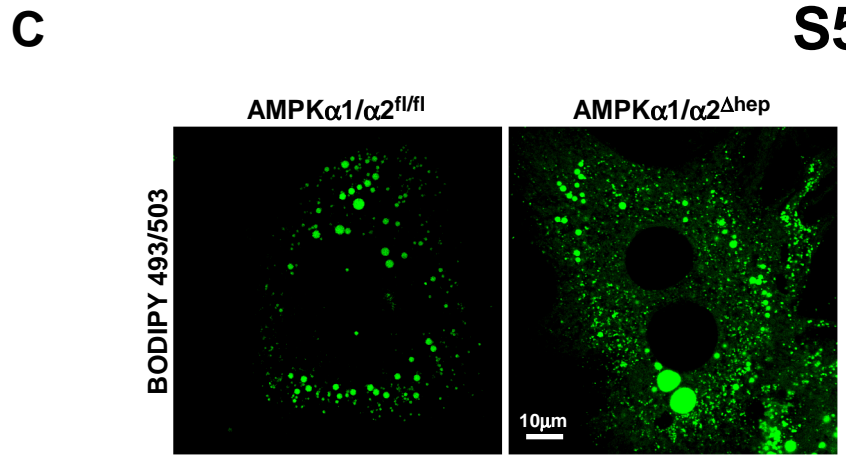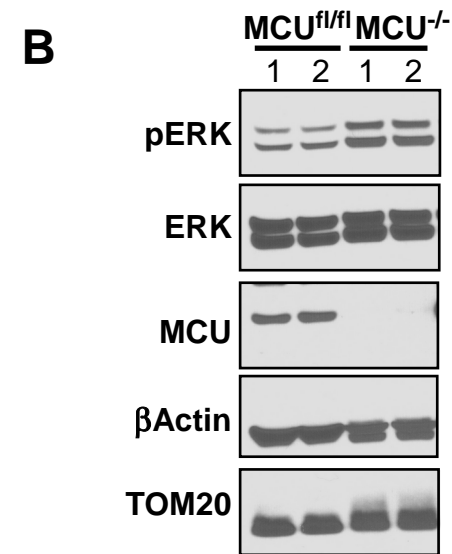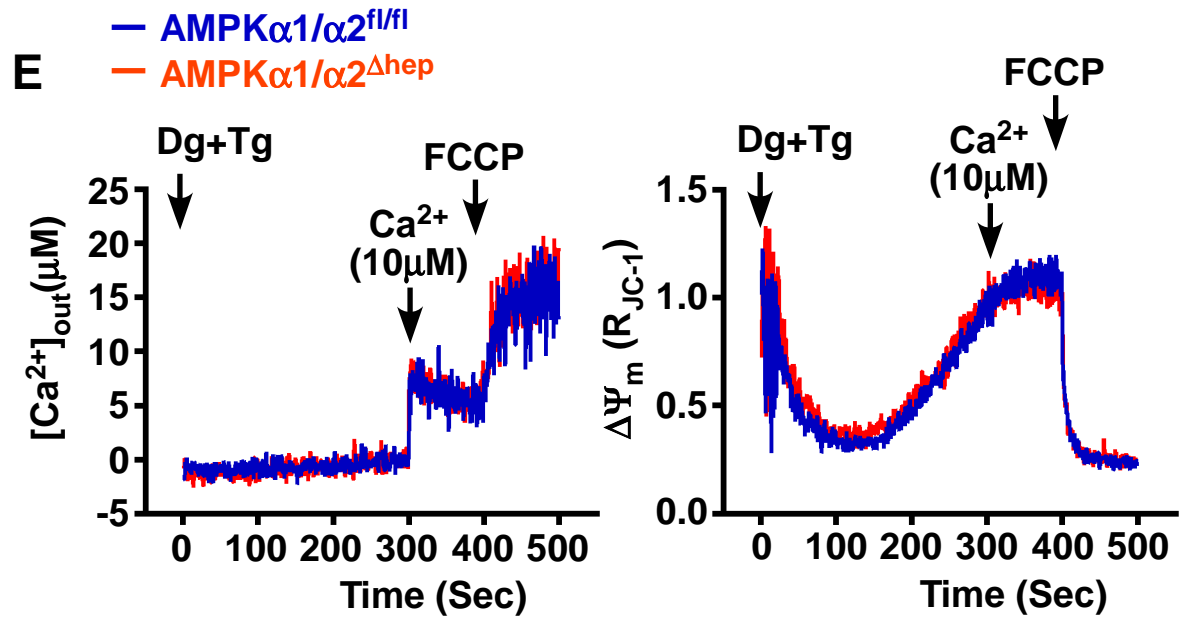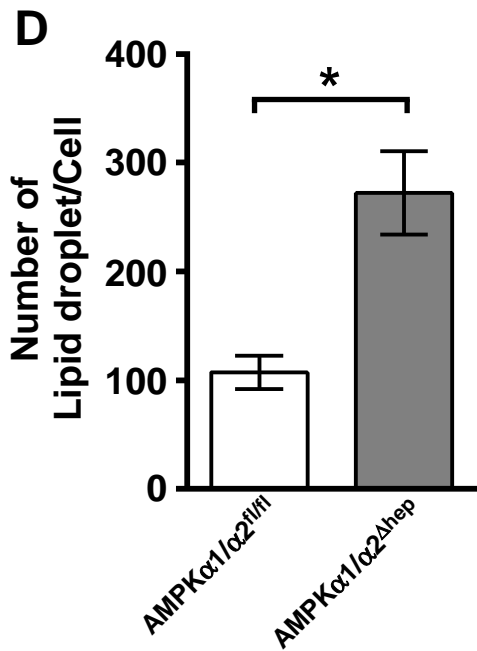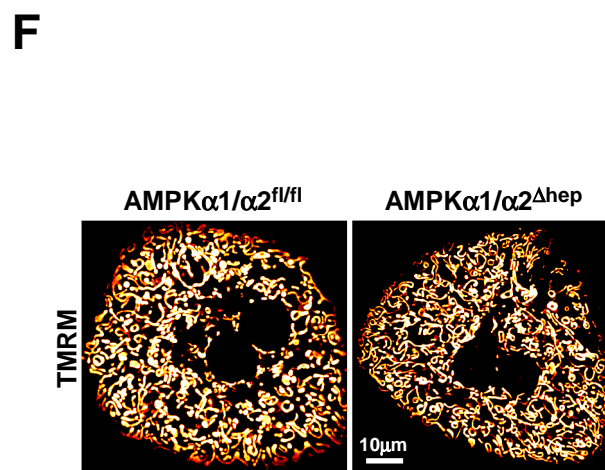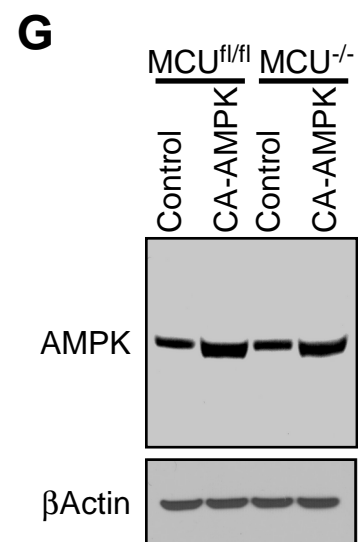

**Figure S5 (Related to Figure 4): AMPK mRNA abundance in MCU<sup>Δhep</sup> hepatocytes, ERK-phosphorylation in MCU<sup>Δhep</sup> hepatocytes, BODIPY493/503 staining, Ca<sup>2+</sup> and ΔΨ<sub>m</sub> measurement in AMPK α1/α2<sup>Δhep</sup> hepatocytes, and reconstitution of CA-AMPK.**

**(A)** AMPK mRNA abundance was quantified in hepatocytes isolated from MCU<sup>fl/fl</sup> and MCU<sup>Δhep</sup> mice. Mean ± SEM; ns= non-significant p value; n = 4 mice. **(B)** ERK phosphorylation is not suppressed in MCU-KO hepatocytes. Hepatocytes cell lysate prepared from MCU<sup>fl/fl</sup>, MCU<sup>Δhep</sup>, and probed with indicated antibodies. n= 4 mice. **(C)** Loss of AMPKα1/α2 results in the increased lipid droplets in primary hepatocytes. Lipid droplets were visualized by confocal microscopy after BODIPY® 493/503 staining in primary hepatocytes isolated from indicated genotype. n = 3. **(D)** Number of lipid droplets were quantified after BODIPY® 493/503 staining. Mean ± SEM. \*p < 0.05; n=20-30 cells. **(E)** Loss of AMPKα1/α2 does not alter <sub>m</sub>Ca<sup>2+</sup> uptake and mitochondrial membrane potential. Representative traces of [Ca<sup>2+</sup>]<sub>out</sub> clearance and ΔΨ<sub>m</sub> in hepatocytes from indicated genotypes. n = 3. **(F)** Hepatic deletion of AMPKα1/α2 does not affect ΔΨ<sub>m</sub>. Representative confocal images of primary hepatocytes isolated from AMPKα1/α2<sup>fl/fl</sup> and AMPKα1/α2<sup>Δhep</sup> mice stained with ΔΨ<sub>m</sub> indicator, TMRM (50nM). n = 3 mice. **(G)** Primary hepatocytes isolated from MCU<sup>fl/fl</sup> and MCU<sup>Δhep</sup> mice were infected with control vector and CA-AMPK expressing adeno-virus. Cell lysate prepared and probed with AMPK antibody.

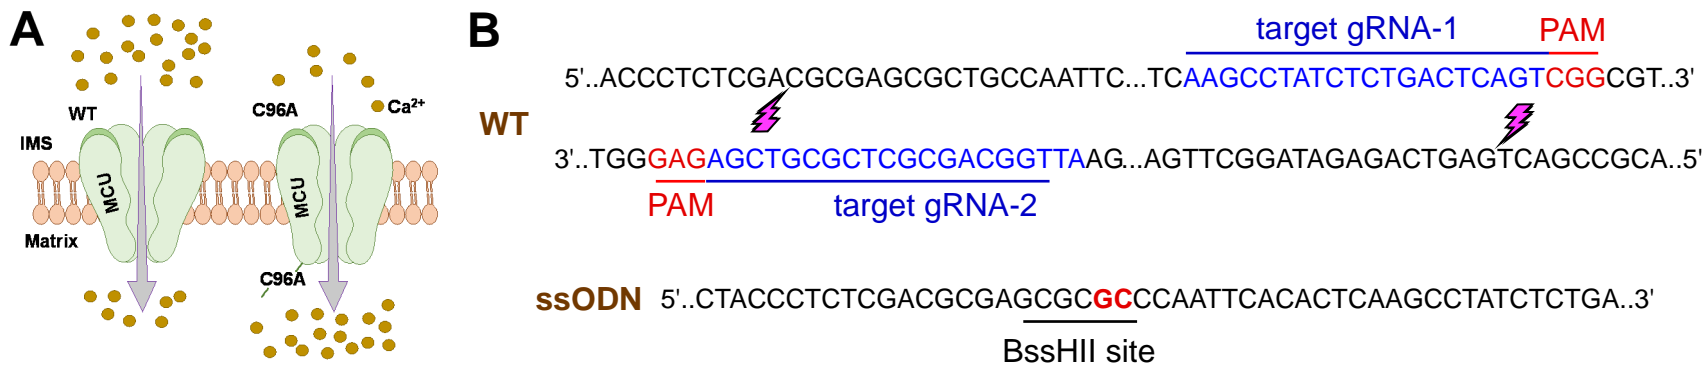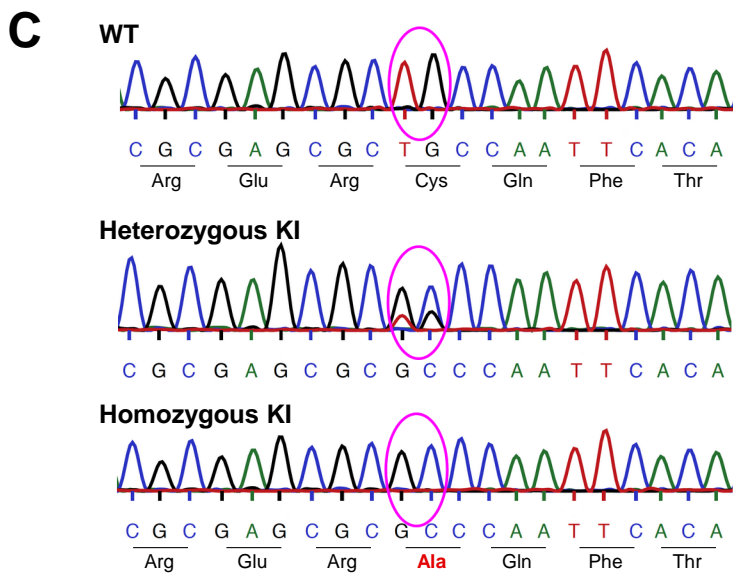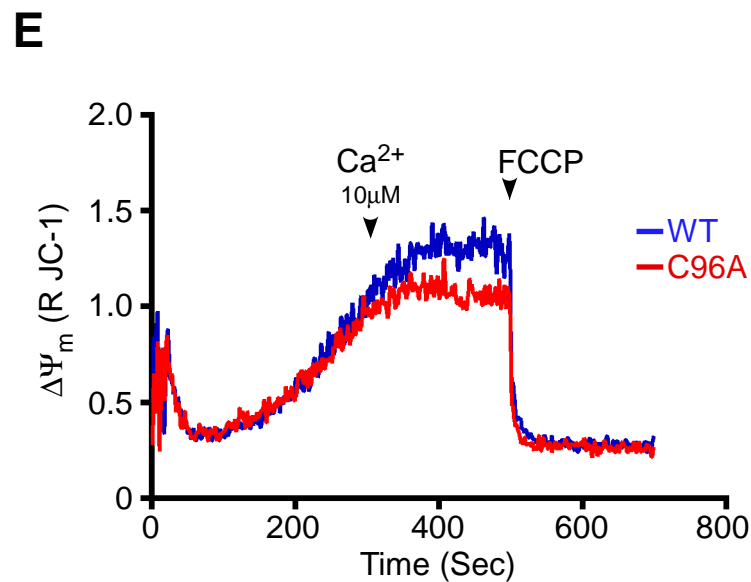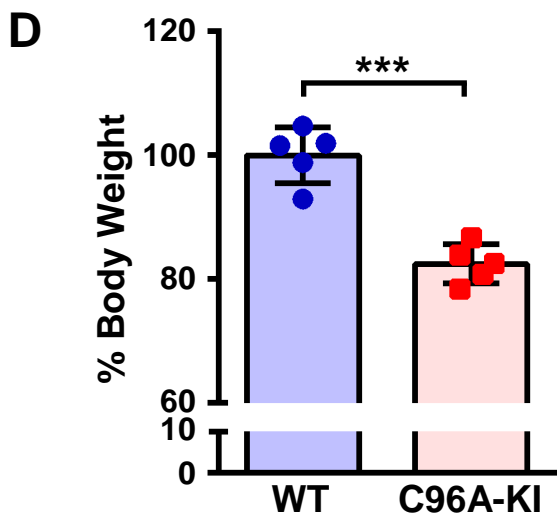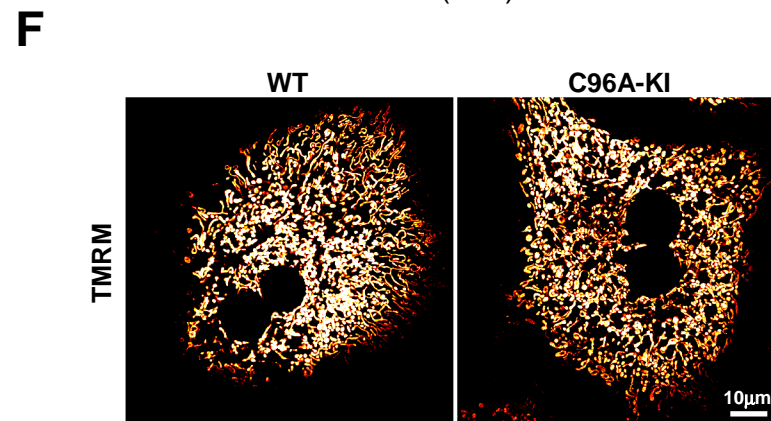

**Figure S6 (Related to Figure 6): Generation and validation of MCU-C96A KI mice and assessment of**

**$\Delta\Psi_m$ .**

**(A)** Schematic represents the constitutive activation of MCU channel due to C96A mutation. **(B)** CRISPR/Cas9 (Nickase) mediated targeting of MCU- genomic region. **(C)** Sequencing data from the WT, heterozygous C96A-KI and homozygous C96A-KI animal shows the replacement of TGC (encode Cys) to GCC (encode Ala). **(D)** The relative body weight of WT and C96A-KI mice. Mean  $\pm$  SEM. \*\*\* $p < 0.001$ ,  $n = 5$ . **(E)** MCU C96A KI does not affect the  $\Delta\Psi_m$ . WT and C96A-KI mice hepatocytes were isolated, permeabilized with digitonin (40  $\mu\text{g/mL}$ ) in intracellular like media containing thapsigargin (2  $\mu\text{M}$ ). The  $\Delta\Psi_m$  indicator JC-1 was added at 20 seconds and after reaching steady state  $\Delta\Psi_m$ . A bolus of extramitochondrial  $\text{Ca}^{2+}$  (10  $\mu\text{M}$ ) was added at the indicated time point before adding the mitochondrial uncoupler FCCP (2  $\mu\text{M}$ ). Representative traces of JC-1 staining showing the  $\Delta\Psi_m$  in permeabilized hepatocytes from WT and C96A-KI.  $n = 3$ . **(F)** C96A-KI does not affect  $\Delta\Psi_m$ . Representative confocal images of primary hepatocytes from WT and C96A-KI mice loaded with  $\Delta\Psi_m$  indicator, TMRM (50nM).  $n = 3$ .

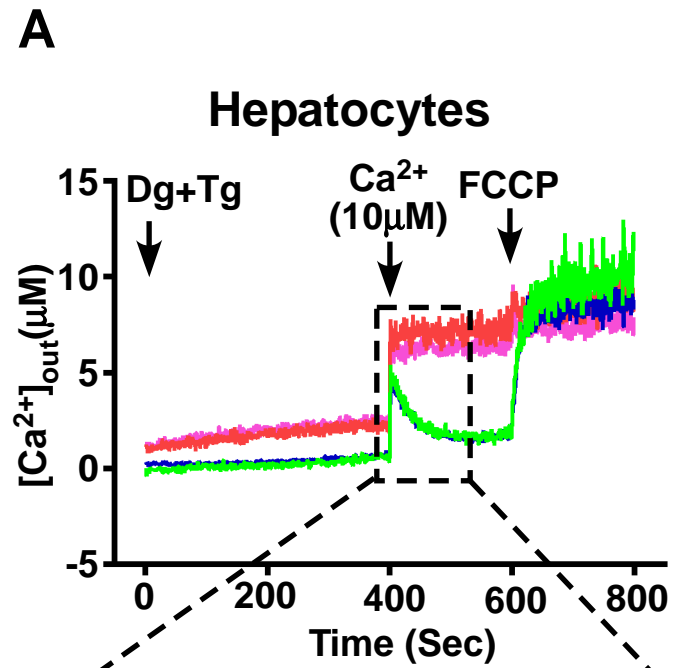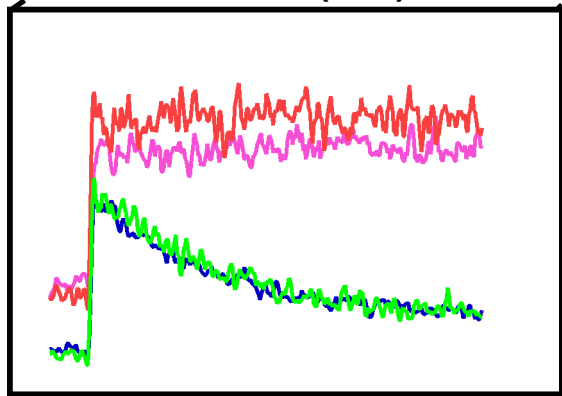

—  $MCU^{fl/fl}$   
 —  $MCU^{fl/fl}$  + Metformin  
 —  $MCU^{\Delta hep}$   
 —  $MCU^{\Delta hep}$  + Metformin

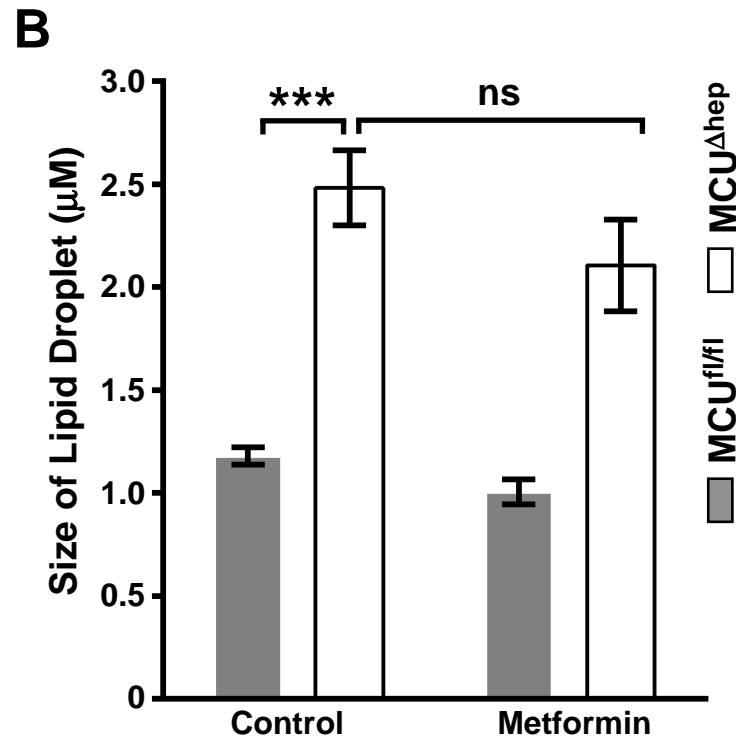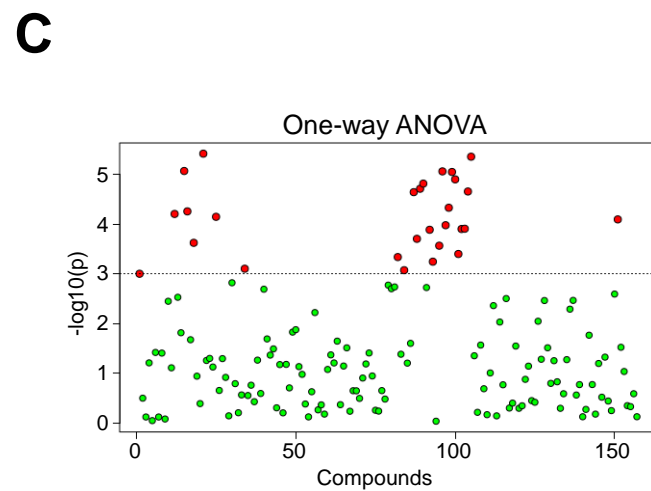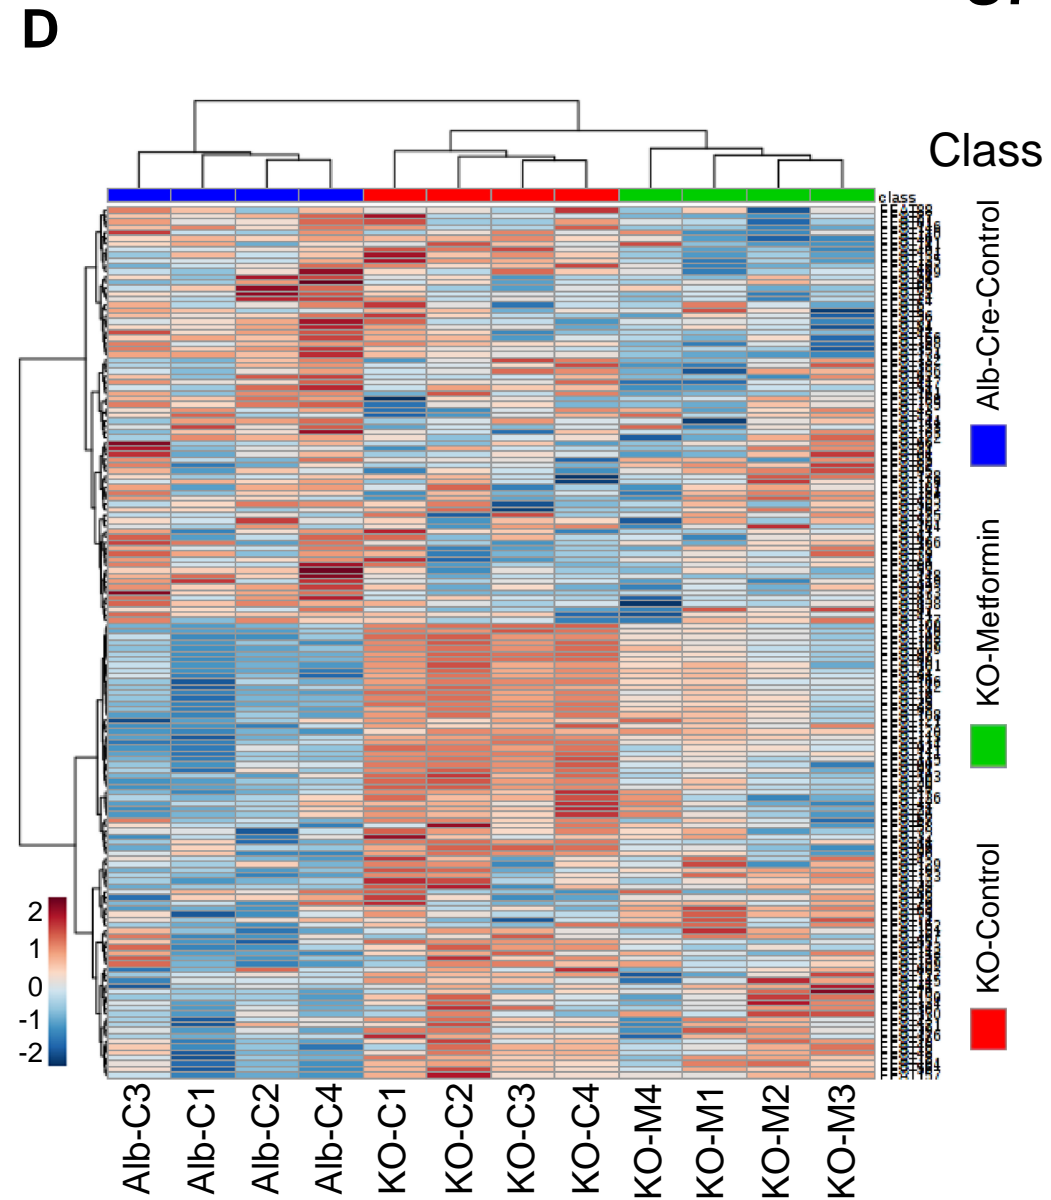



**Figure S7 (Related to Figure 7): Effect of metformin on mitochondrial Ca<sup>2+</sup> uptake and Liver lipidomic alterations in MCU<sup>Δhep</sup> mice.**

**(A)** Metformin treatment did not alter  ${}_m\text{Ca}^{2+}$  uptake in hepatocytes. Hepatocytes isolated from control and metformin administered MCU<sup>fl/fl</sup> and MCU<sup>Δhep</sup> mice were isolated, permeabilized with digitonin (40 μg/mL) in intracellular like media containing thapsigargin (2 μM), and bathed in the Ca<sup>2+</sup> indicator Fura2FF (1 μM). After reaching steady state, a bolus of extramitochondrial Ca<sup>2+</sup> (10 μM) was added at the indicated time point before adding the mitochondrial uncoupler FCCP (2 μM). Representative traces of [Ca<sup>2+</sup>]<sub>out</sub> clearance in permeabilized hepatocytes. n=3. **(B)** Metformin administration does not affect the size of the lipid droplets in MCU-KO hepatocytes. Lipid droplets size were quantified after BODIPY® 493/503 staining. Mean ± SEM. \*\*\*p < 0.001; ns= not significant; n=15-30 cells. **(C)** A one-way ANOVA was performed on the log transformed extracted features obtained from the untargeted analysis of the lipid extract. Those features identified as being significantly different are represented in red while those features which are not significant are represented in green. n=4 mice per group. **(D)** LCMS features extracted from the LCMS analysis of the lipids were subjected to cluster analysis as described in materials and methods. The data reveal a clear separation in the lipidome between control (Alb-Cre-Control), MCU<sup>Δhep</sup> (KO-Control) and metformin treated MCU<sup>Δhep</sup> mice (KO-Metformin). n=4 mice per group.
